# Supplementary material for: Profiling variable-number tandem repeat variation across populations using repeat-pangenome graphs
Source: PubMed Central journal article supplement (PMC8275641; doi:10.1038/s41467-021-24378-0), 2021-07-12
Supplement: 41467_2021_24378_MOESM3_ESM.pdf [file 41467_2021_24378_MOESM3_ESM.pdf]

## **Description of Additional Supplementary Files**

File Name: Supplementary Data 1

Description: Sequencing and assembly of reference genomes

File Name: Supplementary Data 2

Description: VNTR boundary annotations for 73k loci

File Name: Supplementary Data 3

Description: Functional and disease relevance of unstable loci

File Name: Supplementary Data 4

Description: eVNTR discoveries over 32k VNTR loci

File Name: Supplementary Data 5

Description: eVNTR discoveries over 73k VNTR loci

File Name: Supplementary Data 6

Description: eVNTR discoveries README

File Name: Supplementary Data 7

Description: VNTR statistics (32k)

File Name: Supplementary Data 8

Description: VNTR statistics (73k)

File Name: Supplementary Data 9

Description: VNTR statistics README
