# Supplementary material for: Profiling variable-number tandem repeat variation across populations using repeat-pangenome graphs
Source: PubMed Central journal article supplement (PMC8275641; doi:10.1038/s41467-021-24378-0), 2021-07-12
Supplement: 41467_2021_24378_MOESM9_ESM.pdf [file 41467_2021_24378_MOESM9_ESM.pdf]

tissue: Tissue of which the association between TR length and expression TPM count is significant

gene\_id: GENCODE/Ensembl gene ID

gene\_name: GENCODE gene name

chr: Chromosome (gene)

start: Gene start position

end: Gene end position

num\_var: Number of TRs in cis-window (100kbp)

TR\_chr: Chromosome (TR)

TR\_start: TR start position

TR\_end: TR end position

TR\_locus: TR index in our database

eTR: Is an eTR after controlling gene-level FDR from lead\_TRs at 5%

lead\_TR: Is a lead\_TR in the cis-window

lead\_p\_nominal: Nominal P value of the lead TR in this cis-window

p\_nominal: Nominal P value of this TR

slope: Regression slope

slope\_se: Standard error of the regression slope

qval: Benjamini-Hochberg q-value dereived from Bonferroni-adjusted P value
