# Supplementary material for: Profiling variable-number tandem repeat variation across populations using repeat-pangenome graphs
Source: PubMed Central journal article supplement (PMC8275641; doi:10.1038/s41467-021-24378-0), 2021-07-12
Supplement: 41467_2021_24378_MOESM12_ESM.pdf [file 41467_2021_24378_MOESM12_ESM.pdf]

chr: Chromosome where the VNTR is annotated  
start: Start coordinate of the VNTR in hg38  
end: End coordinate of the VNTR in hg38  
ref.len: VNTR length in hg38 after boundary expansion  
asm.len: Mean VNTR length across assemblies after boundary expansion  
chr: Chromosome where the VNTR is annotated  
asm.len.std: Standard deviation of VNTR lengths across assemblies after boundary expansion  
asm.n: Number of supporting genomes beyond hg38  
hg38.acc: Genotyping accuracy using repeat-hg38 graphs measured by mean absolute percentage error in VNTR length. Accuracy is averaged across 16 unrelated genomes.  
rpgg.acc: Genotyping accuracy using repeat-pangenome graphs measured by mean absolute percentage error in VNTR length. Accuracy is averaged across 16 unrelated genomes.  
qual: Averaged genotyping quality of the locus measured by R-squared of the linear fit between assembly and read k-mer counts. Quality score is averaged across 19 genomes each using its own repeat-genome graphs.  
len.vst: Vst statistic for VNTR length across the 5 populations  
len.p: ANOVA P-value of all populations having a same mean in VNTR length  
mikmer.r2: The variance explained in VNTR length by the most informative kmer  
mikmer.ca: The most informative canonical kmer wrt VNTR length  
mikmer.ca': Reverse-complement of the most informative canonical kmer wrt VNTR length  
eqtl: Is an eVNTR  
eqtl.n: Number of tissues with this eVNTR  
eqtl.info: Association results for each discovery.  
FORMAT:  
GENE1:BETA1:QVAL1,GENE2:BETA2;QVAL2[,...] (TISSUE1) [;...]
